# Supplementary material for: Motion-related artefacts in EEG predict neuronally plausible patterns of activation in fMRI data
Source: PubMed Central journal article supplement (PMC3221044; doi:10.1016/j.neuroimage.2011.06.094), 2012-01-02

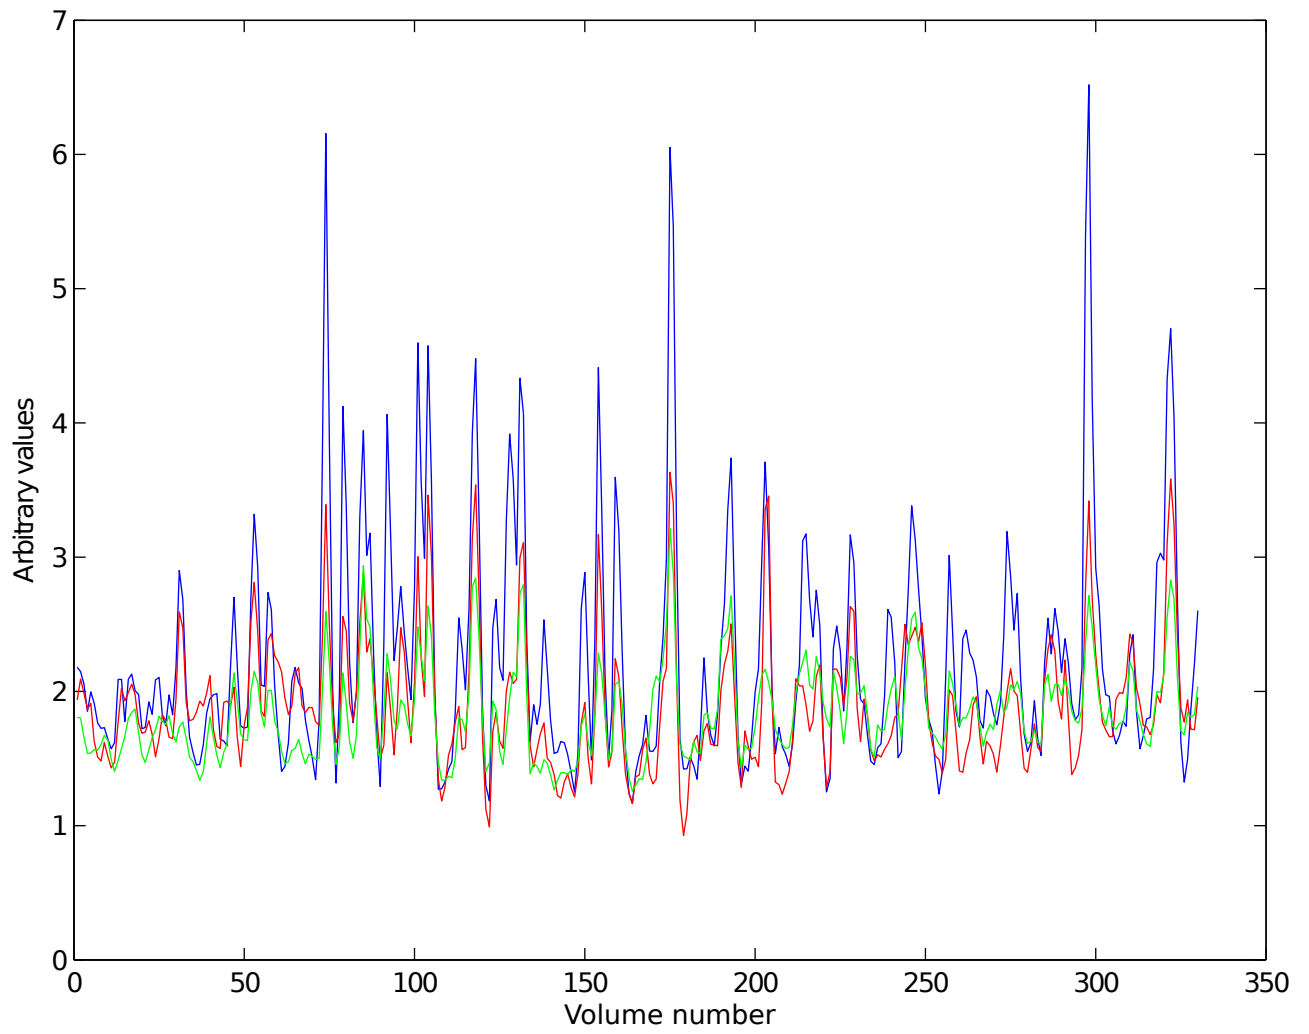

Supplement: mmc1.pdf [file mmc1.pdf]
