# Supplementary material for: Motion-related artefacts in EEG predict neuronally plausible patterns of activation in fMRI data
Source: PubMed Central journal article supplement (PMC3221044; doi:10.1016/j.neuroimage.2011.06.094), 2012-01-02

Correlates of "theta"

Correlates of "movements"

Correlates of "task"

s1

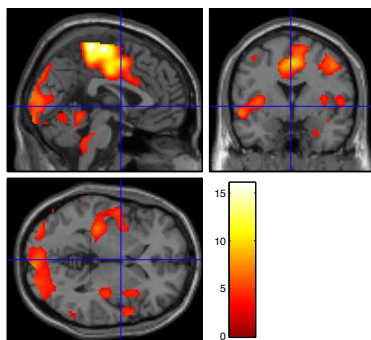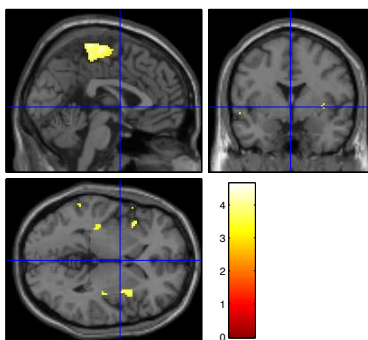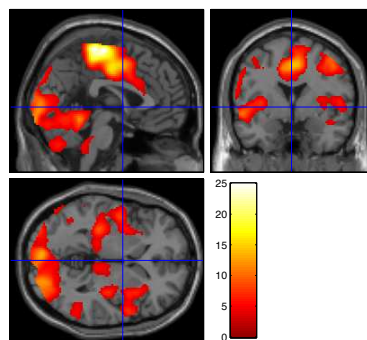

s2

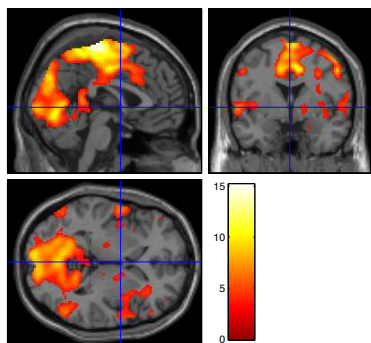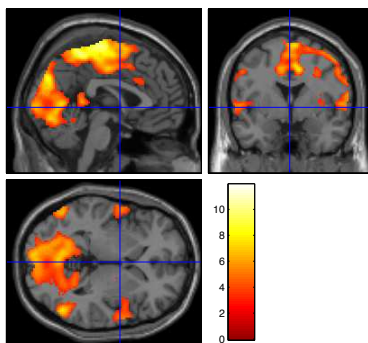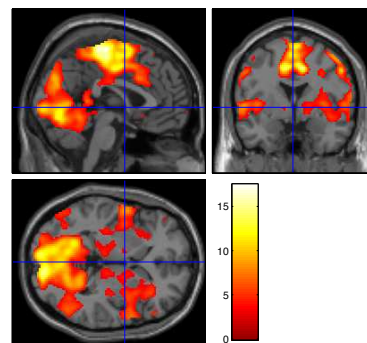

s3

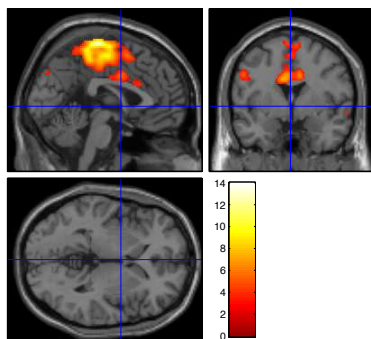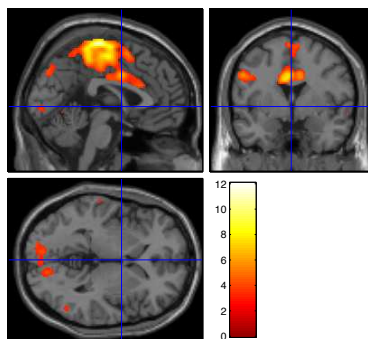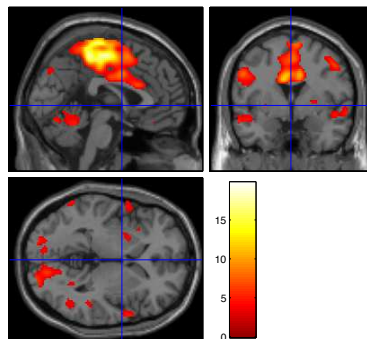

s4

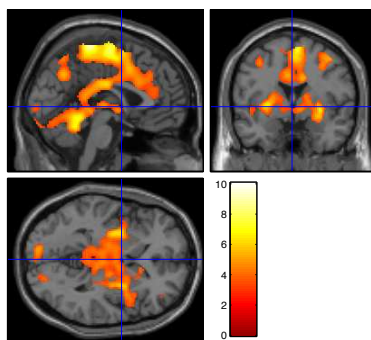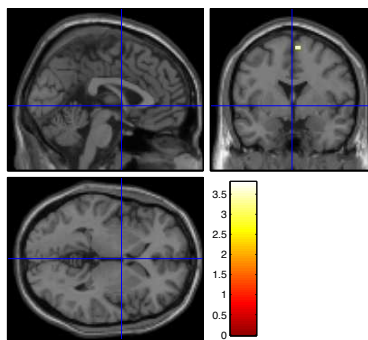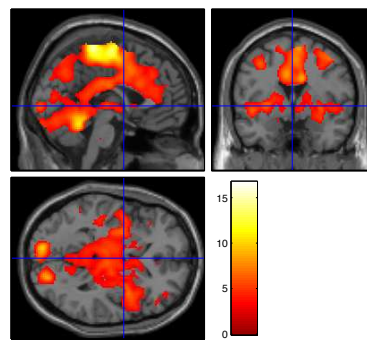

Supplement: mmc2.pdf [file mmc2.pdf]
